# Supplementary material for: A Novel Exopolysaccharide with Metal Adsorption Capacity Produced by a Marine Bacterium Alteromonas sp. JL2810
Source: PubMed Central journal article supplement (PMC5484125; doi:10.3390/md15060175), 2017-06-12
Supplement: marinedrugs-15-00175-s001.pdf [file marinedrugs-15-00175-s001.pdf]

## Supplemental data

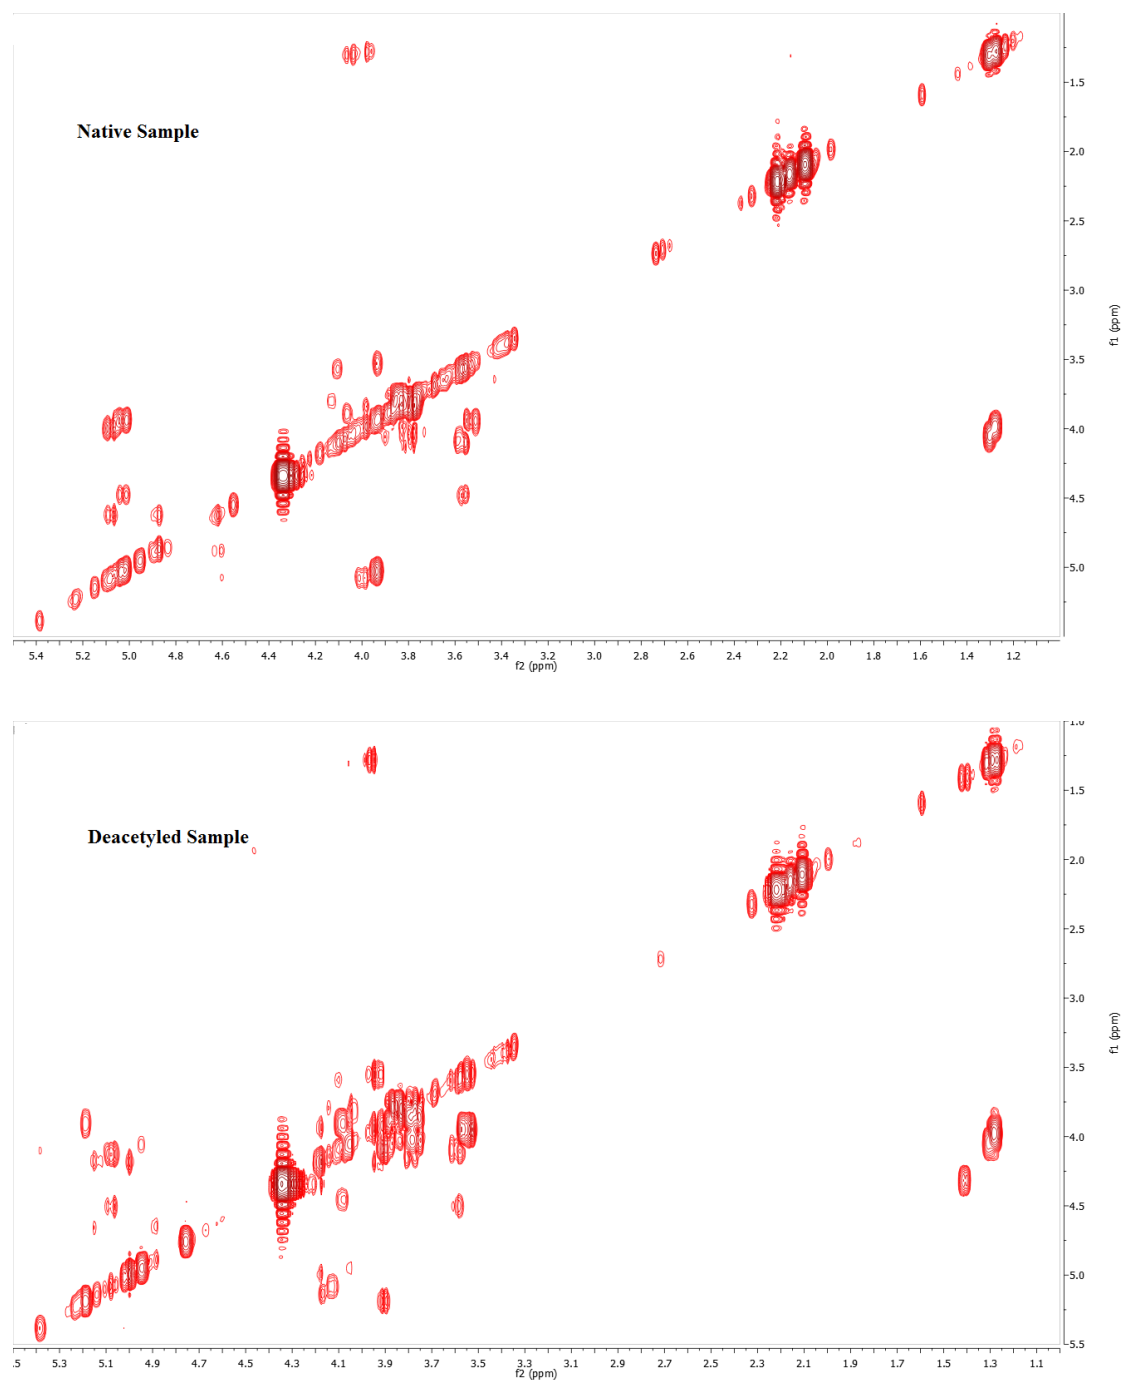

**Figure S1. 2D gCOSY spectra of native and deacetylated JL2810 EPS.**

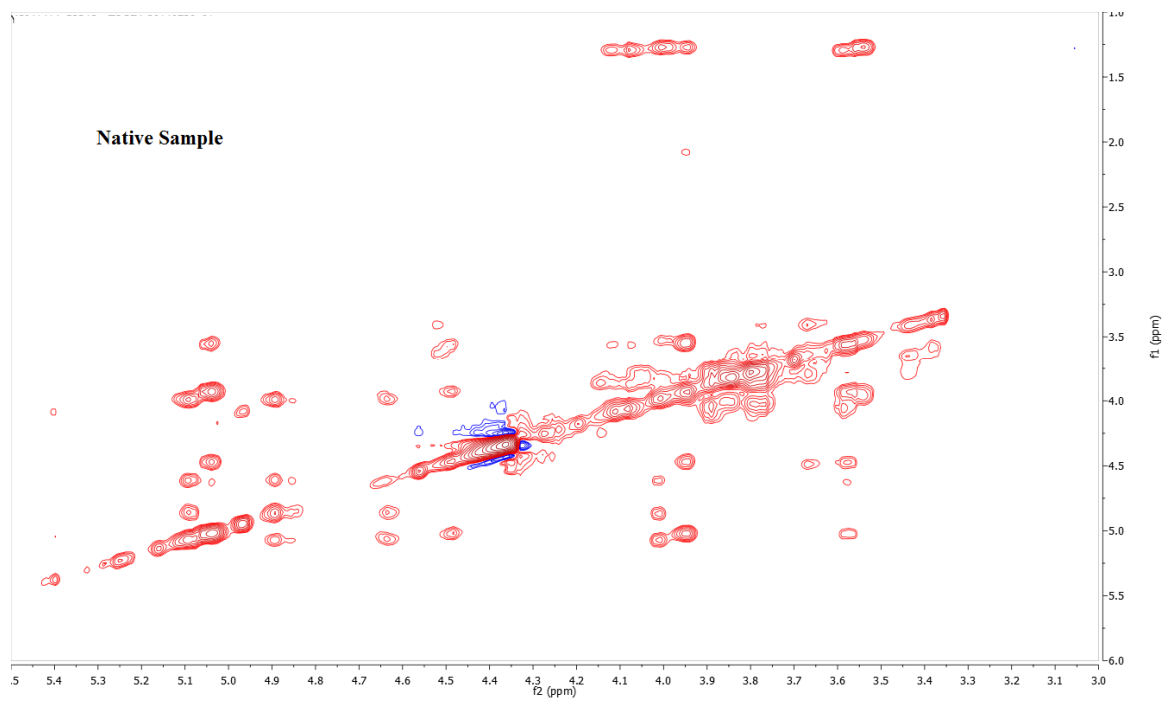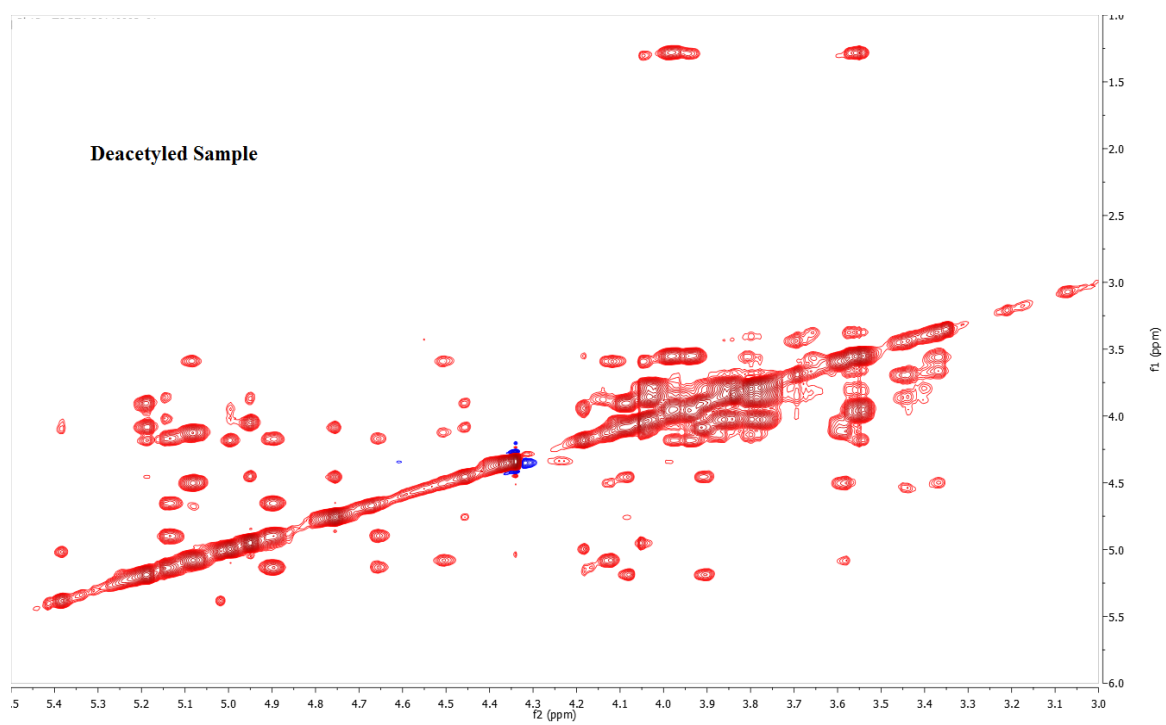

**Figure S2. 2D TOCSY spectra of native and deacetylated JL2810 EPS.**

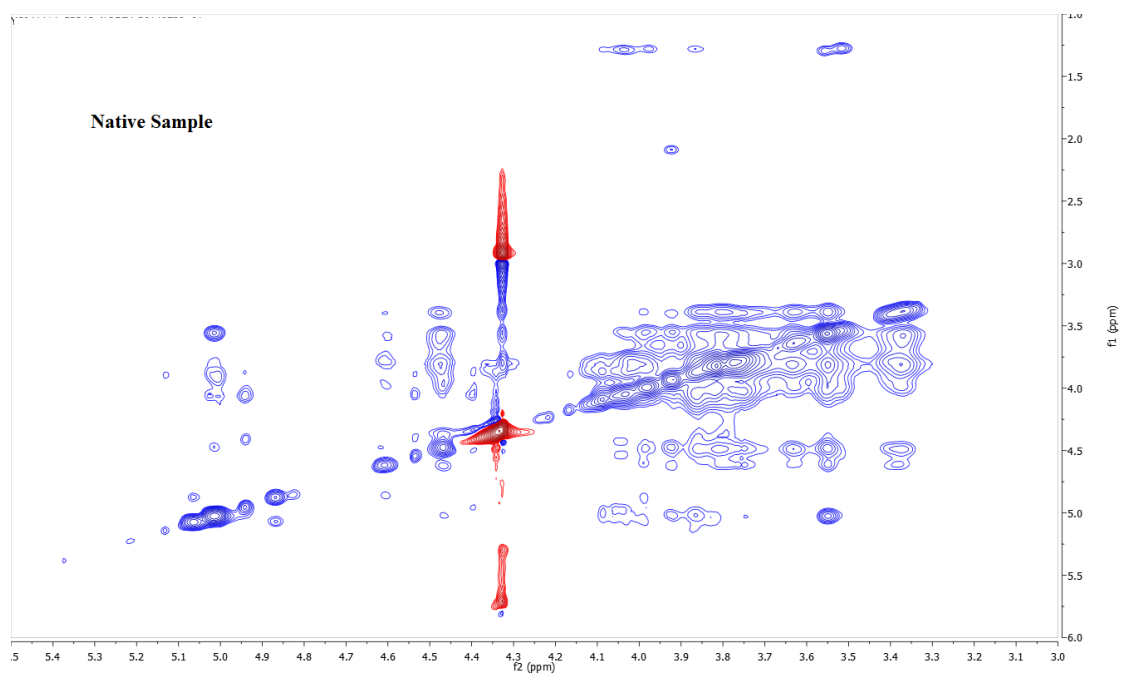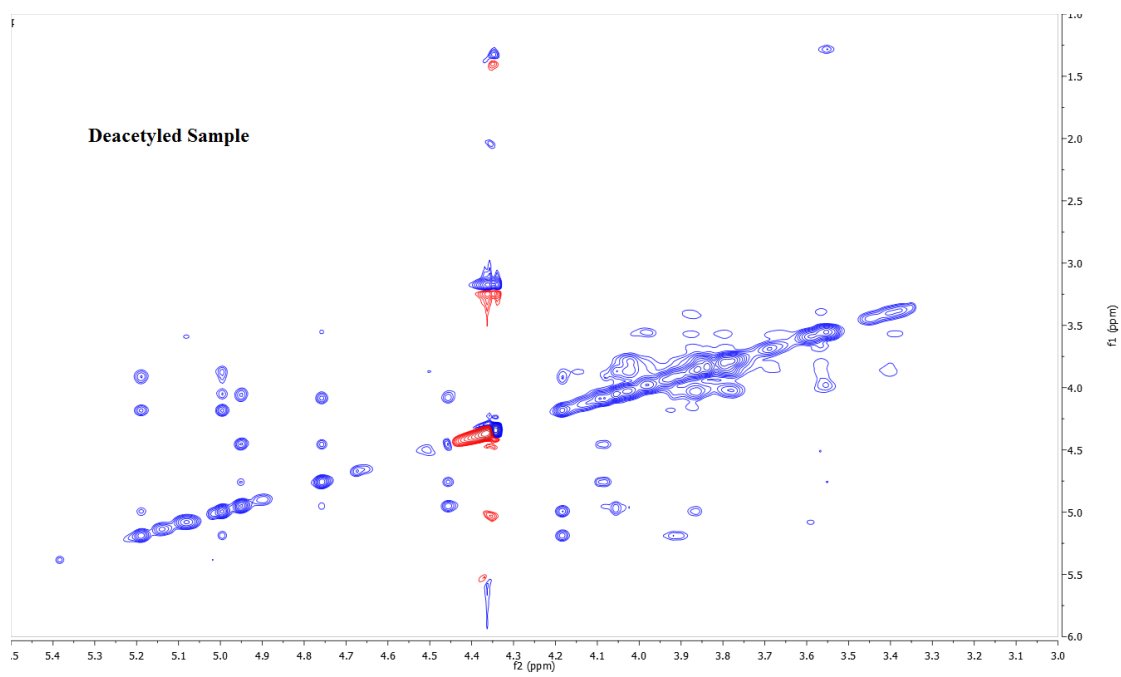

**Figure S3. 2D ROESY spectra of native and deacetylated JL2810 EPS.**

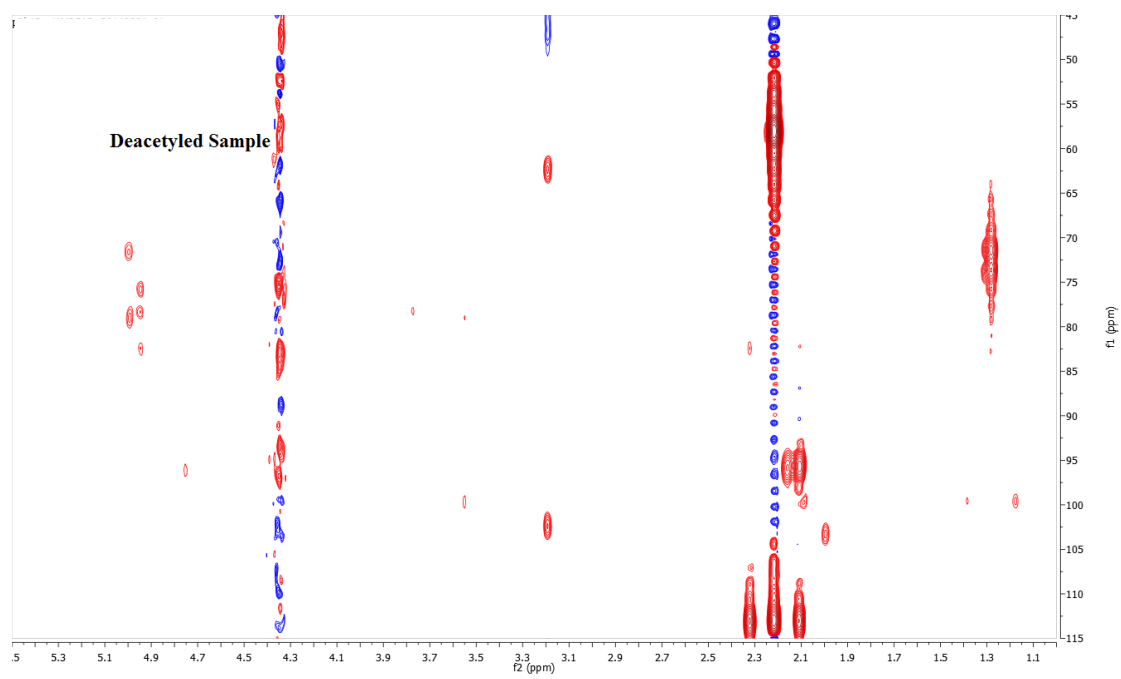

**Figure S4. 2D gHMBC spectrum of deacetyled JL2810 EPS.**
